# Supplementary material for: MHC-linked and un-linked class I genes in the wallaby
Source: PubMed Central journal article supplement (PMC2719672; doi:10.1186/1471-2164-10-310), 2009-07-14
Supplement: 1471-2164-10-310-S4.pdf [file 1471-2164-10-310-S4.pdf]

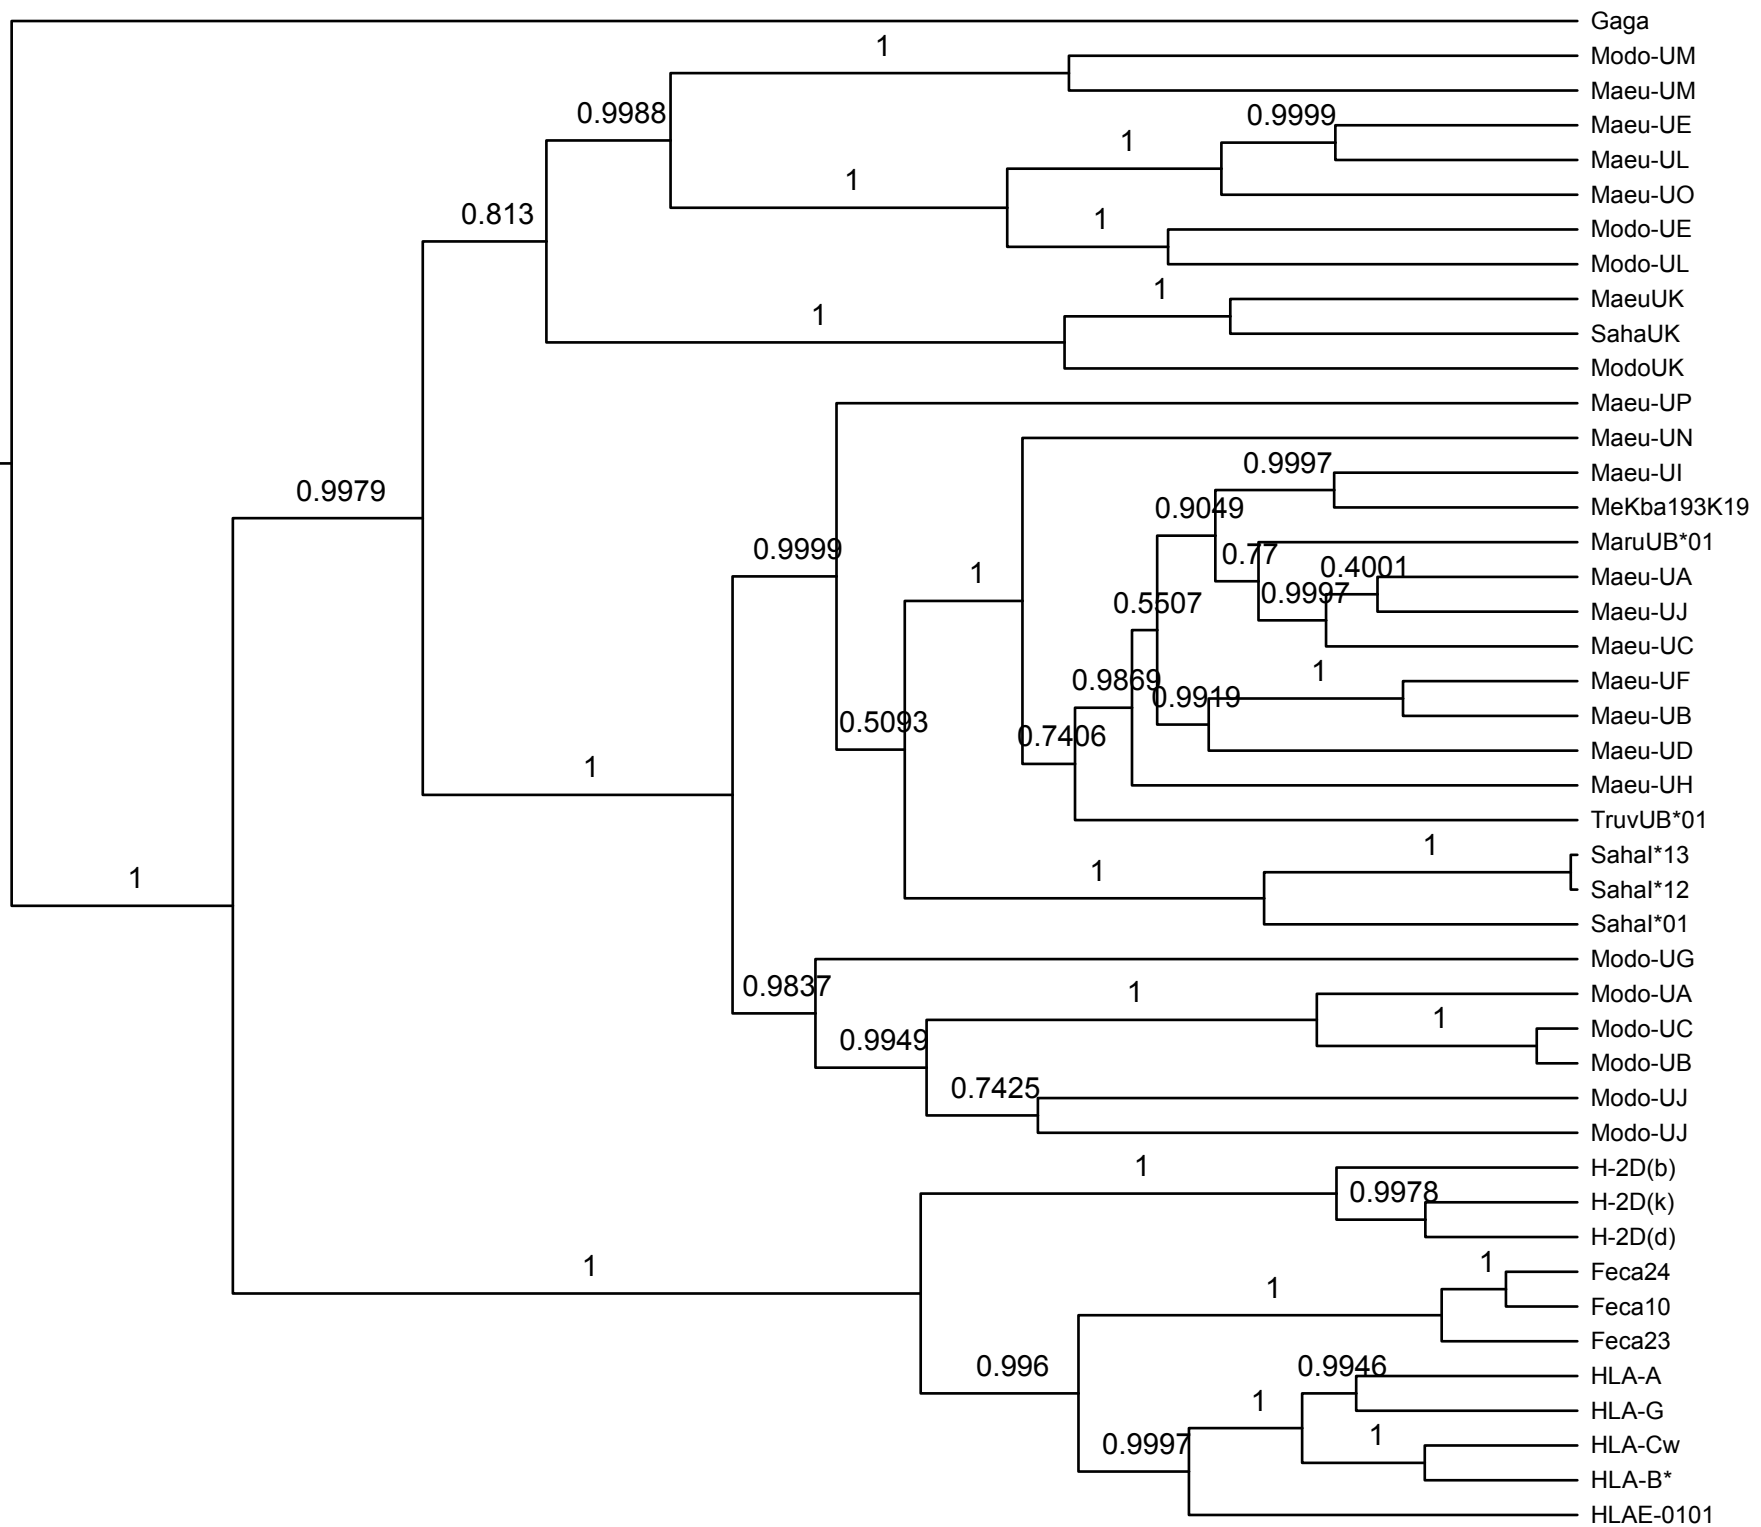

30.0
